# Supplementary material for: Trends in the Incidence of Pancreatic Adenocarcinoma in All 50 United States Examined Through an Age-Period-Cohort Analysis
Source: PubMed Central journal article supplement (PMC7365041; doi:10.1093/jncics/pkaa033), 2020-05-09
Supplement: pkaa033_supplementary_data.pdf [file pkaa033_supplementary_data.pdf]

**Supplementary Table 1.** Age-standardized incidence rates of pancreatic cancer by state (2001-2002)

| State          | Count | Pop        | Rate/100,000 | Lower CI | Upper CI |
|----------------|-------|------------|--------------|----------|----------|
| Louisiana      | 1,018 | 4,423,452  | 23.7         | 22.2     | 25.2     |
| New York       | 4,674 | 19,890,788 | 23.1         | 22.5     | 23.8     |
| Washington     | 1,295 | 6,139,087  | 22.5         | 21.3     | 23.8     |
| Maine          | 338   | 1,461,892  | 22.3         | 20.0     | 24.8     |
| Michigan       | 2,239 | 10,274,658 | 22           | 21.1     | 22.9     |
| New Jersey     | 2,008 | 9,120,732  | 21.9         | 21.0     | 22.9     |
| Connecticut    | 841   | 3,763,819  | 21.8         | 20.3     | 23.3     |
| Hawaii         | 290   | 1,294,759  | 21.7         | 19.3     | 24.3     |
| Illinois       | 2,693 | 12,500,868 | 21.7         | 20.9     | 22.6     |
| Nevada         | 434   | 2,162,084  | 21.7         | 19.7     | 23.9     |
| Massachusetts  | 1,499 | 6,811,832  | 21.5         | 20.4     | 22.6     |
| Pennsylvania   | 3,175 | 13,559,593 | 21.1         | 20.4     | 21.8     |
| South Carolina | 851   | 4,191,837  | 20.7         | 19.4     | 22.2     |
| Wisconsin      | 1,187 | 5,661,681  | 20.6         | 19.4     | 21.8     |
| California     | 6,278 | 33,154,880 | 20.4         | 19.9     | 20.9     |
| Rhode Island   | 249   | 1,130,154  | 20.4         | 17.9     | 23.1     |
| Maryland       | 1,058 | 5,655,877  | 20.3         | 19.1     | 21.6     |
| Georgia        | 1,414 | 8,087,697  | 20.2         | 19.1     | 21.2     |
| Indiana        | 1,256 | 6,233,201  | 20.1         | 19.0     | 21.3     |
| Iowa           | 695   | 3,094,272  | 20.1         | 18.6     | 21.7     |
| Oregon         | 747   | 3,648,698  | 20.1         | 18.7     | 21.6     |
| Idaho          | 248   | 1,277,940  | 19.8         | 17.4     | 22.4     |
| Alaska         | 80    | 597,931    | 19.7         | 15.3     | 24.9     |
| Kentucky       | 827   | 4,234,003  | 19.7         | 18.3     | 21.1     |
| Colorado       | 717   | 4,379,904  | 19.4         | 18.0     | 20.9     |
| Delaware       | 163   | 838,679    | 19.3         | 16.4     | 22.5     |
| Oklahoma       | 715   | 3,545,353  | 19.3         | 18.0     | 20.8     |
| Missouri       | 1,182 | 5,894,767  | 19.2         | 18.1     | 20.3     |
| South Dakota   | 162   | 778,557    | 19.0         | 16.2     | 22.2     |
| Texas          | 3,423 | 19,939,834 | 19.0         | 18.4     | 19.7     |
| Arkansas       | 567   | 2,802,528  | 18.9         | 17.4     | 20.5     |
| Florida        | 4,097 | 18,541,901 | 18.9         | 18.4     | 19.5     |
| North Carolina | 1,556 | 8,432,376  | 18.9         | 18.0     | 19.9     |
| New Hampshire  | 239   | 1,369,826  | 18.9         | 16.6     | 21.4     |
| Alabama        | 892   | 4,639,484  | 18.8         | 17.6     | 20.1     |
| Wyoming        | 95    | 519,084    | 18.8         | 15.2     | 23.0     |
| Ohio           | 2,293 | 11,936,943 | 18.7         | 17.9     | 19.4     |
| Vermont        | 123   | 674,454    | 18.4         | 15.3     | 22.0     |
| Utah           | 296   | 1,808,306  | 17.9         | 15.9     | 20.1     |

---

|               |       |           |      |      |      |
|---------------|-------|-----------|------|------|------|
| Arizona       | 981   | 5,247,480 | 17.8 | 16.7 | 19   |
| Nebraska      | 332   | 1,750,645 | 17.6 | 15.8 | 19.6 |
| West Virginia | 389   | 2,024,619 | 17.6 | 15.9 | 19.4 |
| Kansas        | 503   | 2,737,853 | 17.5 | 16.0 | 19.1 |
| New Mexico    | 310   | 1,844,585 | 17.0 | 15.2 | 19.0 |
| North Dakota  | 127   | 665,162   | 16.9 | 14.0 | 20.1 |
| Tennessee     | 923   | 5,996,756 | 15.5 | 14.5 | 16.6 |
| Minnesota     | 748   | 5,108,965 | 15.2 | 14.1 | 16.3 |
| Montana       | 149   | 983,340   | 14.6 | 12.4 | 17.2 |
| Virginia      | 1,009 | 7,489,079 | 14.5 | 13.6 | 15.4 |
| Mississippi   | ^     | 0         | ^    | ^    | ^    |

---

**Supplementary Table 2.** Age-standardized incidence rates of pancreatic cancer by state (2005-2006)

| State          | Count | Pop        | Rate/100,000 | Lower CI | Upper CI |
|----------------|-------|------------|--------------|----------|----------|
| New Hampshire  | 349   | 1,461,566  | 24.7         | 22.2     | 27.5     |
| Connecticut    | 988   | 3,911,582  | 24.5         | 23.0     | 26.1     |
| Louisiana      | 1,056 | 4,428,283  | 24.0         | 22.6     | 25.5     |
| Maine          | 388   | 1,537,952  | 23.8         | 21.5     | 26.3     |
| New York       | 4,963 | 20,395,482 | 23.6         | 22.9     | 24.2     |
| Illinois       | 3,007 | 12,916,744 | 23.2         | 22.4     | 24.0     |
| Massachusetts  | 1,672 | 6,987,919  | 23.2         | 22.1     | 24.4     |
| Michigan       | 2,515 | 10,631,792 | 23.2         | 22.3     | 24.1     |
| New Jersey     | 2,168 | 9,435,742  | 22.7         | 21.8     | 23.7     |
| Hawaii         | 334   | 1,393,963  | 22.5         | 20.2     | 25.1     |
| Pennsylvania   | 3,476 | 13,937,120 | 22.4         | 21.7     | 23.2     |
| Washington     | 1,419 | 6,621,528  | 22.3         | 21.1     | 23.5     |
| Delaware       | 209   | 914,731    | 22.2         | 19.3     | 25.5     |
| Virginia       | 1,681 | 8,015,737  | 22.1         | 21.1     | 23.2     |
| Alaska         | 94    | 645,458    | 22.0         | 17.5     | 27.3     |
| Missouri       | 1,424 | 6,147,602  | 21.9         | 20.8     | 23.1     |
| Kentucky       | 985   | 4,457,975  | 21.8         | 20.5     | 23.3     |
| South Carolina | 1,002 | 4,540,210  | 21.6         | 20.3     | 23.0     |
| California     | 7,174 | 35,346,994 | 21.5         | 21.0     | 22.1     |
| Maryland       | 1,207 | 5,965,750  | 21.5         | 20.3     | 22.8     |
| Ohio           | 2,749 | 12,291,386 | 21.3         | 20.5     | 22.1     |
| Idaho          | 300   | 1,413,998  | 21.0         | 18.7     | 23.5     |
| North Carolina | 1,911 | 9,225,228  | 20.9         | 19.9     | 21.8     |
| Nebraska       | 406   | 1,811,648  | 20.8         | 18.8     | 22.9     |
| Florida        | 4,864 | 20,344,029 | 20.7         | 20.1     | 21.2     |
| Indiana        | 1,368 | 6,511,882  | 20.6         | 19.5     | 21.8     |
| Nevada         | 494   | 2,535,715  | 20.6         | 18.8     | 22.6     |
| Oregon         | 829   | 3,907,357  | 20.4         | 19.0     | 21.8     |
| Montana        | 226   | 1,038,185  | 20.3         | 17.7     | 23.1     |
| Vermont        | 142   | 703,876    | 20.2         | 17.0     | 23.8     |
| Alabama        | 1,007 | 4,858,613  | 19.9         | 18.7     | 21.2     |
| Mississippi    | 593   | 2,910,710  | 19.9         | 18.3     | 21.6     |
| Georgia        | 1,567 | 8,902,801  | 19.8         | 18.8     | 20.8     |
| Iowa           | 709   | 3,178,583  | 19.8         | 18.3     | 21.3     |
| North Dakota   | 151   | 678,969    | 19.7         | 16.6     | 23.1     |
| Oklahoma       | 762   | 3,679,009  | 19.5         | 18.2     | 21.0     |
| Wyoming        | 107   | 546,494    | 19.5         | 15.9     | 23.6     |
| Wisconsin      | 1,190 | 5,938,726  | 19.4         | 18.3     | 20.6     |
| New Mexico     | 394   | 1,991,898  | 19.3         | 17.4     | 21.3     |

---

|               |       |            |      |      |      |
|---------------|-------|------------|------|------|------|
| Arkansas      | 610   | 2,940,335  | 19.2 | 17.7 | 20.8 |
| Texas         | 3,835 | 21,840,120 | 19.2 | 18.6 | 19.8 |
| Rhode Island  | 234   | 1,158,791  | 18.9 | 16.5 | 21.5 |
| Utah          | 351   | 2,000,550  | 18.9 | 16.9 | 21.0 |
| West Virginia | 441   | 2,083,875  | 18.9 | 17.1 | 20.7 |
| Colorado      | 774   | 4,733,278  | 18.4 | 17.1 | 19.8 |
| Kansas        | 548   | 2,823,534  | 18.2 | 16.7 | 19.8 |
| Tennessee     | 1,173 | 6,396,848  | 18.1 | 17.1 | 19.2 |
| Minnesota     | 946   | 5,367,362  | 17.9 | 16.7 | 19.0 |
| South Dakota  | 162   | 810,908    | 17.6 | 15.0 | 20.6 |
| Arizona       | 1,105 | 5,941,517  | 17.5 | 16.5 | 18.6 |

---

**Supplementary Table 3.** Age-standardized incidence rates of pancreatic cancer by state (2010-2011)

| State          | Count | Pop        | Rate/100,000 | Lower CI | Upper CI |
|----------------|-------|------------|--------------|----------|----------|
| Louisiana      | 1,219 | 4,657,693  | 25.0         | 23.6     | 26.4     |
| New York       | 5,564 | 20,931,659 | 24.7         | 24.1     | 25.4     |
| Connecticut    | 1,059 | 4,032,113  | 24.4         | 22.9     | 25.9     |
| Mississippi    | 791   | 3,054,381  | 24.4         | 22.7     | 26.2     |
| Maine          | 434   | 1,589,296  | 24.2         | 21.9     | 26.6     |
| Pennsylvania   | 4,009 | 14,301,885 | 24.2         | 23.5     | 25.0     |
| Alaska         | 130   | 695,564    | 24.1         | 19.8     | 29.0     |
| New Jersey     | 2,457 | 9,747,164  | 24.0         | 23.0     | 25.0     |
| Hawaii         | 402   | 1,491,568  | 23.9         | 21.5     | 26.4     |
| South Carolina | 1,278 | 5,000,920  | 23.9         | 22.6     | 25.3     |
| Alabama        | 1,331 | 5,143,690  | 23.7         | 22.4     | 25.0     |
| Kentucky       | 1,150 | 4,699,261  | 23.1         | 21.8     | 24.5     |
| Missouri       | 1,627 | 6,420,233  | 22.9         | 21.8     | 24.0     |
| Wisconsin      | 1,540 | 6,176,853  | 22.9         | 21.7     | 24.1     |
| Illinois       | 3,175 | 13,427,997 | 22.8         | 22.0     | 23.6     |
| Maryland       | 1,432 | 6,250,865  | 22.8         | 21.6     | 24.0     |
| Michigan       | 2,690 | 10,819,689 | 22.8         | 21.9     | 23.7     |
| Washington     | 1,638 | 7,188,931  | 22.5         | 21.4     | 23.7     |
| Delaware       | 245   | 987,669    | 22.1         | 19.4     | 25.1     |
| Indiana        | 1,614 | 6,829,337  | 22.1         | 21.0     | 23.2     |
| Iowa           | 826   | 3,269,628  | 21.7         | 20.3     | 23.3     |
| Vermont        | 166   | 724,943    | 21.6         | 18.4     | 25.3     |
| California     | 8,047 | 37,814,331 | 21.4         | 21.0     | 21.9     |
| Georgia        | 2,000 | 9,890,163  | 21.4         | 20.5     | 22.4     |
| Idaho          | 359   | 1,566,909  | 21.4         | 19.2     | 23.8     |
| Oregon         | 984   | 4,198,720  | 21.4         | 20.1     | 22.8     |
| North Carolina | 2,260 | 10,244,298 | 21.0         | 20.2     | 21.9     |
| Massachusetts  | 1,634 | 7,250,826  | 20.9         | 19.9     | 22.0     |
| Florida        | 5,476 | 21,771,504 | 20.8         | 20.2     | 21.3     |
| New Hampshire  | 325   | 1,527,690  | 20.6         | 18.4     | 23.0     |
| Oklahoma       | 878   | 3,887,739  | 20.6         | 19.3     | 22.0     |
| Virginia       | 1,789 | 8,584,394  | 20.6         | 19.7     | 21.6     |
| West Virginia  | 508   | 2,154,676  | 20.4         | 18.6     | 22.2     |
| Texas          | 4,745 | 24,538,208 | 20.3         | 19.7     | 20.9     |
| Arizona        | 1,464 | 6,624,485  | 19.9         | 18.9     | 21.0     |
| Montana        | 250   | 1,100,977  | 19.9         | 17.5     | 22.6     |
| Nebraska       | 416   | 1,887,751  | 19.9         | 18.0     | 22.0     |
| South Dakota   | 199   | 853,536    | 19.9         | 17.2     | 23.0     |
| Ohio           | 2,738 | 12,615,947 | 19.7         | 18.9     | 20.4     |

---

|              |       |           |      |      |      |
|--------------|-------|-----------|------|------|------|
| Tennessee    | 1,456 | 6,886,260 | 19.6 | 18.6 | 20.6 |
| Utah         | 426   | 2,301,777 | 19.4 | 17.5 | 21.3 |
| Colorado     | 963   | 5,241,301 | 19.1 | 17.9 | 20.4 |
| Rhode Island | 248   | 1,163,875 | 19.0 | 16.6 | 21.6 |
| Minnesota    | 1,125 | 5,638,597 | 18.9 | 17.8 | 20.1 |
| North Dakota | 161   | 705,503   | 18.9 | 16.1 | 22.2 |
| Arkansas     | 652   | 3,106,208 | 18.7 | 17.3 | 20.2 |
| Kansas       | 597   | 2,931,589 | 18.7 | 17.2 | 20.3 |
| Nevada       | 530   | 2,825,236 | 18.6 | 17.0 | 20.3 |
| New Mexico   | 400   | 2,153,030 | 17.0 | 15.3 | 18.7 |
| Wyoming      | 98    | 591,173   | 15.2 | 12.3 | 18.6 |

---

**Supplementary Table 4.** Age-standardized incidence rates of pancreatic cancer by state (2015-2016)

| State          | Count | Pop        | Rate/100,000 | Lower CI | Upper CI |
|----------------|-------|------------|--------------|----------|----------|
| Mississippi    | 929   | 3,139,618  | 26.1         | 24.5     | 27.9     |
| Louisiana      | 1,396 | 4,865,507  | 25.8         | 24.4     | 27.2     |
| Connecticut    | 1,193 | 4,082,857  | 25.0         | 23.5     | 26.4     |
| Pennsylvania   | 4,348 | 14,483,743 | 24.6         | 23.9     | 25.4     |
| New York       | 6,043 | 21,629,168 | 24.5         | 23.8     | 25.1     |
| Delaware       | 313   | 1,061,131  | 24.4         | 21.7     | 27.4     |
| South Carolina | 1,497 | 5,420,216  | 23.7         | 22.5     | 25.0     |
| Indiana        | 1,896 | 7,055,748  | 23.6         | 22.6     | 24.8     |
| Kentucky       | 1,291 | 4,845,676  | 23.4         | 22.1     | 24.7     |
| New Jersey     | 2,630 | 10,054,703 | 23.4         | 22.5     | 24.4     |
| Minnesota      | 1,551 | 5,922,242  | 23.3         | 22.1     | 24.5     |
| Maine          | 463   | 1,616,010  | 23.2         | 21.1     | 25.5     |
| Wisconsin      | 1,718 | 6,372,410  | 23.2         | 22.1     | 24.3     |
| Idaho          | 448   | 1,710,019  | 23.1         | 21.0     | 25.4     |
| Michigan       | 2,998 | 11,013,989 | 23.1         | 22.3     | 24.0     |
| South Dakota   | 251   | 899,034    | 23.1         | 20.3     | 26.3     |
| Alabama        | 1,398 | 5,311,916  | 22.8         | 21.6     | 24.1     |
| Nebraska       | 516   | 1,965,549  | 22.8         | 20.9     | 25.0     |
| Illinois       | 3,482 | 13,800,154 | 22.7         | 22.0     | 23.5     |
| Iowa           | 916   | 3,358,591  | 22.6         | 21.1     | 24.2     |
| Alaska         | 150   | 717,210    | 22.5         | 18.7     | 26.7     |
| Georgia        | 2,474 | 10,661,208 | 22.5         | 21.6     | 23.4     |
| Hawaii         | 426   | 1,566,191  | 22.5         | 20.4     | 24.8     |
| North Carolina | 2,780 | 11,004,782 | 22.5         | 21.7     | 23.4     |
| Maryland       | 1,583 | 6,566,116  | 22.2         | 21.1     | 23.3     |
| Florida        | 6,631 | 23,829,423 | 21.8         | 21.3     | 22.4     |
| Washington     | 1,847 | 7,751,543  | 21.6         | 20.6     | 22.6     |
| Montana        | 303   | 1,152,318  | 21.5         | 19.1     | 24.1     |
| Tennessee      | 1,760 | 7,232,330  | 21.2         | 20.2     | 22.2     |
| Rhode Island   | 291   | 1,178,881  | 21.1         | 18.7     | 23.8     |
| Texas          | 5,798 | 27,183,890 | 21.0         | 20.4     | 21.5     |
| Kansas         | 724   | 3,010,071  | 20.9         | 19.4     | 22.5     |
| Ohio           | 3,161 | 12,827,335 | 20.9         | 20.2     | 21.7     |
| North Dakota   | 182   | 751,672    | 20.8         | 17.8     | 24.2     |
| West Virginia  | 541   | 2,153,056  | 20.8         | 19.1     | 22.7     |
| Arkansas       | 785   | 3,203,525  | 20.7         | 19.2     | 22.2     |
| Oregon         | 1,087 | 4,512,629  | 20.7         | 19.5     | 22.0     |
| Virginia       | 2,068 | 9,078,070  | 20.7         | 19.8     | 21.7     |
| New Hampshire  | 378   | 1,569,486  | 20.6         | 18.5     | 22.9     |

---

|               |       |            |      |      |      |
|---------------|-------|------------|------|------|------|
| Wyoming       | 143   | 618,063    | 20.4 | 17.1 | 24.2 |
| Massachusetts | 1,746 | 7,549,758  | 20.3 | 19.3 | 21.3 |
| Missouri      | 1,562 | 6,604,749  | 20.2 | 19.2 | 21.3 |
| New Mexico    | 529   | 2,210,981  | 20.2 | 18.5 | 22.1 |
| California    | 8,633 | 40,556,874 | 19.9 | 19.5 | 20.4 |
| Nevada        | 675   | 3,130,791  | 19.5 | 18.1 | 21.1 |
| Arizona       | 1,693 | 7,265,402  | 19.4 | 18.4 | 20.3 |
| Oklahoma      | 903   | 4,046,170  | 19.3 | 18.0 | 20.6 |
| Utah          | 497   | 2,629,635  | 19.2 | 17.5 | 21.0 |
| Colorado      | 1,140 | 5,746,551  | 18.9 | 17.8 | 20.0 |
| Vermont       | 168   | 730,536    | 18.5 | 15.8 | 21.7 |

---



**Supplementary Table 5.** Annual and average annual percent change in age-standardized pancreatic cancer incidence rates over time among the U.S. population over 35 years-old, by state

| State          | Joinpoint segment |          | APC (95% CI)         | Joinpoint segment |          | APC (95% CI)         |
|----------------|-------------------|----------|----------------------|-------------------|----------|----------------------|
|                | Year start        | Year end |                      | Year start        | Year end |                      |
| Alaska         | 2001              | 2016     | 0.38 (-1.15, 1.93)   | 2001              | 2016     | 0.38 (-1.15, 1.93)   |
| Alabama        | 2001              | 2016     | 1.52 (0.78, 2.27)    | 2001              | 2016     | 1.52 (0.78, 2.27)    |
| Arkansas       | 2001              | 2016     | 0.65 (0.10, 1.21)    | 2001              | 2016     | 0.65 (0.10, 1.21)    |
| Arizona        | 2001              | 2004     | -2.33 (-7.10, 2.70)  | 2001              | 2016     | 0.40 (-0.74, 1.56)   |
|                | 2004              | 2012     | 2.71 (1.56, 3.86)    |                   |          |                      |
|                | 2012              | 2016     | -2.06 (-4.49, 0.44)  |                   |          |                      |
| California     | 2001              | 2008     | 1.24 (0.43, 2.06)    | 2001              | 2016     | -0.07 (-0.48, 0.34)  |
|                | 2008              | 2016     | -1.20 (-1.69, -0.71) |                   |          |                      |
| Colorado       | 2001              | 2016     | -0.11 (-0.68, 0.47)  | 2001              | 2016     | -0.11 (-0.68, 0.47)  |
| Connecticut    | 2001              | 2009     | 2.03 (0.80, 3.28)    | 2001              | 2016     | 1.08 (-0.51, 2.69)   |
|                | 2009              | 2013     | -3.51 (-8.55, 1.80)  |                   |          |                      |
|                | 2013              | 2016     | 4.87 (-0.28, 10.28)  |                   |          |                      |
| Delaware       | 2001              | 2016     | 1.63 (0.70, 2.58)    | 2001              | 2016     | 1.63 (0.70, 2.58)    |
| Florida        | 2001              | 2016     | 0.77 (0.42, 1.12)    | 2001              | 2016     | 0.77 (0.42, 1.12)    |
| Georgia        | 2001              | 2016     | 0.94 (0.48, 1.41)    | 2001              | 2016     | 0.94 (0.48, 1.41)    |
| Hawaii         | 2001              | 2016     | 0.20 (-0.63, 1.04)   | 2001              | 2016     | 0.20 (-0.63, 1.04)   |
| Idaho          | 2001              | 2016     | 0.76 (-0.12, 1.65)   | 2001              | 2016     | 0.76 (-0.12, 1.65)   |
| Illinois       | 2001              | 2005     | 1.93 (-0.08, 3.98)   | 2001              | 2016     | 0.30 (-0.24, 0.84)   |
|                | 2005              | 2016     | -0.29 (-0.69, 0.11)  |                   |          |                      |
| Indiana        | 2001              | 2016     | 1.10 (0.74, 1.45)    | 2001              | 2016     | 1.10 (0.74, 1.45)    |
| Iowa           | 2001              | 2016     | 0.90 (0.43, 1.37)    | 2001              | 2016     | 0.90 (0.43, 1.37)    |
| Kansas         | 2001              | 2016     | 1.19 (0.37, 2.02)    | 2001              | 2016     | 1.19 (0.37, 2.02)    |
| Kentucky       | 2001              | 2016     | 1.18 (0.64, 1.72)    | 2001              | 2016     | 1.18 (0.64, 1.72)    |
| Louisiana      | 2001              | 2016     | 0.66 (0.06, 1.27)    | 2001              | 2016     | 0.66 (0.06, 1.27)    |
| Massachussetts | 2001              | 2016     | -0.32 (-1.05, 0.41)  | 2001              | 2016     | -0.32 (-1.05, 0.41)  |
| Maryland       | 2001              | 2016     | 0.26 (-0.22, 0.74)   | 2001              | 2016     | 0.26 (-0.22, 0.74)   |
| Maine          | 2001              | 2016     | 0.33 (-0.57, 1.25)   | 2001              | 2016     | 0.33 (-0.57, 1.25)   |
| Michigan       | 2001              | 2016     | 0.23 (-0.23, 0.70)   | 2001              | 2016     | 0.23 (-0.23, 0.70)   |
| Minnesota      | 2001              | 2016     | 2.66 (2.00, 3.32)    | 2001              | 2016     | 2.66 (2.00, 3.32)    |
| Missouri       | 2001              | 2010     | 1.50 (0.02, 3.01)    | 2001              | 2016     | 0.13 (-1.06, 1.33)   |
|                | 2010              | 2016     | -1.89 (-4.32, 0.61)  |                   |          |                      |
| Mississippi    | 2003              | 2016     | 2.99 (2.08, 3.90)    | 2003              | 2016     | 2.99 (2.08, 3.90)    |
| Montana        | 2001              | 2016     | 1.16 (-0.08, 2.41)   | 2001              | 2016     | 1.16 (-0.08, 2.41)   |
| North Carolina | 2001              | 2016     | 1.12 (0.63, 1.62)    | 2001              | 2016     | 1.12 (0.63, 1.62)    |
| North Dakota   | 2001              | 2016     | 0.81 (-0.22, 1.86)   | 2001              | 2016     | 0.81 (-0.22, 1.86)   |
| Nebraska       | 2001              | 2016     | 1.58 (0.76, 2.40)    | 2001              | 2016     | 1.58 (0.76, 2.40)    |
| New Hampshire  | 2001              | 2005     | 6.62 (-1.51, 15.41)  | 2001              | 2016     | 0.74 (-1.37, 2.89)   |
|                | 2005              | 2016     | -1.32 (-2.75, 0.13)  |                   |          |                      |
| New Jersey     | 2001              | 2009     | 1.54 (0.54, 2.54)    | 2001              | 2016     | 0.56 (-0.10, 1.22)   |
|                | 2009              | 2016     | -0.55 (-1.66, 0.56)  |                   |          |                      |
| New Mexico     | 2001              | 2016     | 1.05 (0.11, 1.99)    | 2001              | 2016     | 1.05 (0.11, 1.99)    |
| Nevada         | 2001              | 2016     | -0.85 (-1.68, -0.01) | 2001              | 2016     | -0.85 (-1.68, -0.01) |
| New York       | 2001              | 2009     | 0.88 (0.42, 1.34)    | 2001              | 2016     | 0.41 (0.09, 0.72)    |
|                | 2009              | 2016     | -0.13 (-0.67, 0.41)  |                   |          |                      |
| Ohio           | 2001              | 2007     | 3.43 (1.76, 5.14)    | 2001              | 2016     | 1.01 (-0.68, 2.73)   |
|                | 2007              | 2010     | -3.51 (-11.77, 5.53) |                   |          |                      |
|                | 2010              | 2016     | 0.93 (-0.44, 2.31)   |                   |          |                      |
| Oklahoma       | 2001              | 2016     | -0.03 (-0.67, 0.61)  | 2001              | 2016     | -0.03 (-0.67, 0.61)  |
| Oregon         | 2001              | 2016     | 0.30 (-0.17, 0.77)   | 2001              | 2016     | 0.30 (-0.17, 0.77)   |

|                |      |      |                     |      |      |                     |
|----------------|------|------|---------------------|------|------|---------------------|
| Pennsylvania   | 2001 | 2016 | 0.94 (0.63, 1.26)   | 2001 | 2016 | 0.94 (0.63, 1.26)   |
| Rhode Island   | 2001 | 2016 | 0.53 (-0.70, 1.76)  | 2001 | 2016 | 0.53 (-0.70, 1.77)  |
| South Carolina | 2001 | 2016 | 1.01 (0.52, 1.50)   | 2001 | 2016 | 1.01 (0.52, 1.50)   |
| South Dakota   | 2001 | 2016 | 1.45 (0.04, 2.88)   | 2001 | 2016 | 1.45 (0.04, 2.88)   |
| Tennessee      | 2001 | 2007 | 4.02 (2.45, 5.61)   | 2001 | 2016 | 2.21 (1.54, 2.88)   |
|                | 2007 | 2016 | 1.03 (0.32, 1.73)   |      |      |                     |
| Texas          | 2001 | 2016 | 0.65 (0.32, 0.98)   | 2001 | 2016 | 0.65 (0.32, 0.98)   |
| Utah           | 2001 | 2016 | 0.61 (-0.37, 1.61)  | 2001 | 2016 | 0.61 (-0.37, 1.61)  |
| Virginia       | 2001 | 2004 | 17.10 (4.77, 30.89) | 2001 | 2016 | 3.11 (0.94, 5.32)   |
|                | 2004 | 2016 | -0.12 (-1.19, 0.96) |      |      |                     |
| Vermont        | 2001 | 2016 | 0.34 (-1.60, 2.30)  | 2001 | 2016 | 0.34 (-1.60, 2.30)  |
| Washington     | 2001 | 2016 | -0.22 (-0.67, 0.22) | 2001 | 2016 | -0.22 (-0.67, 0.22) |
| Wisconsin      | 2001 | 2016 | 1.25 (0.63, 1.87)   | 2001 | 2016 | 1.25 (0.63, 1.87)   |
| West Virginia  | 2001 | 2016 | 1.49 (0.71, 2.28)   | 2001 | 2016 | 1.49 (0.71, 2.28)   |
| Wyoming        | 2001 | 2016 | -0.16 (-2.02, 1.73) | 2001 | 2016 | -0.16 (-2.02, 1.73) |

**Supplementary Table 6.** Annual and average annual percent change in age-standardized pancreatic cancer incidence rates over time among non-Hispanic whites over 35 years-old, by state

| State          | Joinpoint segment |          | APC (95% CI)         | Joinpoint segment |          | APC (95% CI)         |
|----------------|-------------------|----------|----------------------|-------------------|----------|----------------------|
|                | Year start        | Year end |                      | Year start        | Year end |                      |
| Alaska         | 2001              | 2016     | 0.19 (-1.04, 1.43)   | 2001              | 2016     | 0.19 (-1.04, 1.43)   |
| Alabama        | 2001              | 2016     | 1.61 (0.88, 2.35)    | 2001              | 2016     | 1.61 (0.88, 2.35)    |
| Arkansas       | 2001              | 2016     | 0.57 (-0.09, 1.23)   | 2001              | 2016     | 0.57 (-0.09, 1.23)   |
| Arizona        | 2001              | 2012     | 1.93 (1.22, 2.64)    | 2001              | 2016     | 0.87 (0.03, 1.72)    |
|                |                   | 2012     | 2016                 |                   |          |                      |
|                |                   |          | -1.97 (-4.85, 0.99)  |                   |          |                      |
| California     | 2001              | 2008     | 1.54 (0.79, 2.29)    | 2001              | 2016     | 0.05 (-0.36, 0.47)   |
|                |                   | 2008     | 2016                 |                   |          |                      |
|                |                   |          | -1.23 (-1.82, -0.64) |                   |          |                      |
| Colorado       | 2001              | 2016     | 0.07 (-0.46, 0.60)   | 2001              | 2016     | 0.07 (-0.46, 0.60)   |
| Connecticut    | 2001              | 2009     | 2.35 (1.23, 3.48)    | 2001              | 2016     | 1.13 (-0.70, 2.99)   |
|                |                   | 2009     | 2012                 |                   |          |                      |
|                |                   |          | -4.65 (-13.29, 4.85) |                   |          |                      |
|                |                   | 2013     | 2016                 |                   |          |                      |
|                |                   |          | 3.18 (0.12, 6.33)    |                   |          |                      |
| Delaware       | 2001              | 2016     | 1.75 (0.70, 2.81)    | 2001              | 2016     | 1.75 (0.70, 2.81)    |
| Florida        | 2001              | 2016     | 0.94 (0.60, 1.27)    | 2001              | 2016     | 0.94 (0.60, 1.27)    |
| Georgia        | 2001              | 2016     | 1.37 (0.81, 1.92)    | 2001              | 2016     | 1.37 (0.81, 1.92)    |
| Hawaii         | 2001              | 2016     | -0.03 (-1.90, 1.88)  | 2001              | 2016     | -0.03 (-1.90, 1.88)  |
| Idaho          | 2001              | 2016     | 0.76 (-0.22, 1.75)   | 2001              | 2016     | 0.76 (-0.22, 1.75)   |
| Illinois       | 2001              | 2016     | 0.38 (0.04, 0.72)    | 2001              | 2016     | 0.38 (0.04, 0.72)    |
| Indiana        | 2001              | 2016     | 1.25 (0.92, 1.58)    | 2001              | 2016     | 1.25 (0.92, 1.58)    |
| Iowa           | 2001              | 2016     | 1.00 (0.53, 1.47)    | 2001              | 2016     | 1.00 (0.53, 1.47)    |
| Kansas         | 2001              | 2016     | 1.27 (0.40, 2.14)    | 2001              | 2016     | 1.27 (0.40, 2.14)    |
| Kentucky       | 2001              | 2016     | 1.31 (0.80, 1.83)    | 2001              | 2016     | 1.31 (0.80, 1.83)    |
| Louisiana      | 2001              | 2016     | 1.23 (0.60, 1.86)    | 2001              | 2016     | 1.23 (0.60, 1.86)    |
| Massachusetts  | 2001              | 2016     | -0.33 (-1.11, 0.45)  | 2001              | 2016     | -0.33 (-1.11, 0.45)  |
| Maryland       | 2001              | 2016     | 0.44 (-0.07, 0.95)   | 2001              | 2016     | 0.44 (-0.07, 0.95)   |
| Maine          | 2001              | 2016     | 0.33 (-0.56, 1.23)   | 2001              | 2016     | 0.33 (-0.56, 1.23)   |
| Michigan       | 2001              | 2016     | 0.16 (-0.32, 0.64)   | 2001              | 2016     | 0.16 (-0.32, 0.64)   |
| Minnesota      | 2001              | 2016     | 2.70 (2.10, 3.30)    | 2001              | 2016     | 2.70 (2.10, 3.30)    |
| Missouri       | 2001              | 2016     | 0.32 (-0.36, 1.00)   | 2001              | 2016     | 0.32 (-0.36, 1.00)   |
| Mississippi    | 2003              | 2016     | 3.20 (2.02, 4.38)    | 2003              | 2016     | 3.20 (2.02, 4.38)    |
| Montana        | 2001              | 2016     | 1.19 (-0.21, 2.60)   | 2001              | 2016     | 1.19 (-0.21, 2.60)   |
| North Carolina | 2001              | 2016     | 1.19 (0.75, 1.64)    | 2001              | 2016     | 1.19 (0.75, 1.64)    |
| North Dakota   | 2001              | 2016     | 0.73 (-0.28, 1.75)   | 2001              | 2016     | 0.73 (-0.28, 1.75)   |
| Nebraska       | 2001              | 2016     | 1.65 (0.69, 2.62)    | 2001              | 2016     | 1.65 (0.69, 2.62)    |
| New Hampshire  | 2001              | 2016     | 0.21 (-0.82, 1.24)   | 2001              | 2016     | 0.21 (-0.82, 1.24)   |
| New Jersey     | 2001              | 2016     | 0.79 (0.37, 1.21)    | 2001              | 2016     | 0.79 (0.37, 1.21)    |
| New Mexico     | 2001              | 2016     | 1.26 (0.18, 2.34)    | 2001              | 2016     | 1.26 (0.18, 2.34)    |
| Nevada         | 2001              | 2016     | -0.51 (-1.43, 0.43)  | 2001              | 2016     | -0.85 (-1.68, -0.01) |
| New York       | 2001              | 2016     | 0.50 (0.21, 0.79)    | 2001              | 2016     | 0.50 (0.21, 0.79)    |
| Ohio           | 2001              | 2007     | 3.35 (1.81, 4.91)    | 2001              | 2016     | 1.14 (-0.46, 2.76)   |
|                |                   | 2007     | 2010                 |                   |          |                      |
|                |                   |          | -3.23 (-11.00, 5.21) |                   |          |                      |
|                |                   | 2010     | 2016                 |                   |          |                      |
|                |                   |          | 1.19 (-0.28, 2.67)   |                   |          |                      |
| Oklahoma       | 2001              | 2016     | -0.06 (-0.74, 0.63)  | 2001              | 2016     | -0.06 (-0.74, 0.63)  |
| Oregon         | 2001              | 2014     | 0.68 (0.17, 1.19)    | 2001              | 2016     | -0.17 (-1.30, 0.96)  |
|                |                   | 2014     | 2016                 |                   |          |                      |
|                |                   |          | -5.55 (-13.63, 3.30) |                   |          |                      |
| Pennsylvania   | 2001              | 2016     | 1.11 (0.83, 1.38)    | 2001              | 2016     | 1.11 (0.83, 1.38)    |
| Rhode Island   | 2001              | 2016     | 0.93 (-0.24, 2.11)   | 2001              | 2016     | 0.93 (-0.24, 2.11)   |
| South Carolina | 2001              | 2016     | 1.07 (0.47, 1.67)    | 2001              | 2016     | 1.07 (0.47, 1.67)    |
| South Dakota   | 2001              | 2016     | 1.34 (-0.09, 2.78)   | 2001              | 2016     | 1.34 (-0.09, 2.78)   |
| Tennessee      | 2001              | 2007     | 4.41 (2.43, 6.43)    | 2001              | 2016     | 2.31 (1.46, 3.15)    |
|                |                   | 2007     | 2016                 |                   |          |                      |
|                |                   |          | 0.93 (0.05, 1.81)    |                   |          |                      |

---

|               |      |      |                     |      |      |                     |
|---------------|------|------|---------------------|------|------|---------------------|
| Texas         | 2001 | 2016 | 0.91 (0.53, 1.29)   | 2001 | 2016 | 0.91 (0.53, 1.29)   |
| Utah          | 2001 | 2016 | 0.53 (-0.64, 1.71)  | 2001 | 2016 | 0.53 (-0.64, 1.71)  |
| Virginia      | 2001 | 2004 | 16.79 (3.64, 31.61) | 2001 | 2016 | 3.05 (0.75, 5.41)   |
|               | 2004 | 2016 | -0.12 (-1.20, 0.97) |      |      |                     |
| Vermont       | 2001 | 2016 | 0.24 (-1.69, 2.20)  | 2001 | 2016 | 0.24 (-1.69, 2.20)  |
| Washington    | 2001 | 2016 | -0.10 (-0.57, 0.36) | 2001 | 2016 | -0.10 (-0.57, 0.36) |
| Wisconsin     | 2001 | 2016 | 1.09 (0.44, 1.75)   | 2001 | 2016 | 1.09 (0.44, 1.75)   |
| West Virginia | 2001 | 2016 | 1.54 (0.74, 2.35)   | 2001 | 2016 | 1.54 (0.74, 2.35)   |
| Wyoming       | 2001 | 2016 | -0.16 (-2.05, 1.77) | 2001 | 2016 | -0.16 (-2.05, 1.77) |

---

**Supplementary Table 7.** Annual and average annual percent change in age-standardized pancreatic cancer incidence rates over time among non-Hispanic blacks over 35 years-old, by state

| State          | Joinpoint segment |          | APC (95% CI)         | Joinpoint segment |          | AAPC (95% CI)        |
|----------------|-------------------|----------|----------------------|-------------------|----------|----------------------|
|                | Year start        | Year end |                      | Year start        | Year end |                      |
| Alaska         | -                 | -        | -                    | -                 | -        | -                    |
| Alabama        | 2001              | 2016     | 1.41 (0.26, 2.57)    | 2001              | 2016     | 1.41 (0.26, 2.57)    |
| Arkansas       | 2001              | 2016     | 0.84 (-0.56, 2.27)   | 2001              | 2016     | 0.84 (-0.56, 2.27)   |
| Arizona        | -                 | -        | -                    | -                 | -        | -                    |
| California     | 2001              | 2005     | 3.95 (-2.20, 10.48)  | 2001              | 2016     | -0.39 (-2.02, 1.27)  |
|                | 2005              | 2016     | -1.92 (-3.11, -0.72) |                   |          |                      |
| Colorado       | -                 | -        | -                    | -                 | -        | -                    |
| Connecticut    | 2001              | 2016     | -1.96 (-4.05, 0.18)  | 2001              | 2016     | -1.96 (-4.05, 0.18)  |
| Delaware       | -                 | -        | -                    | -                 | -        | -                    |
| Florida        | 2001              | 2016     | 0.39 (-0.62, 1.42)   | 2001              | 2016     | 0.39 (-0.62, 1.42)   |
| Georgia        | 2001              | 2016     | 0.06 (-0.49, 0.60)   | 2001              | 2016     | 0.06 (-0.49, 0.60)   |
| Hawaii         | -                 | -        | -                    | -                 | -        | -                    |
| Idaho          | -                 | -        | -                    | -                 | -        | -                    |
| Illinois       | 2001              | 2016     | -0.44 (-1.26, 0.39)  | 2001              | 2016     | -0.44 (-1.26, 0.39)  |
| Indiana        | 2001              | 2016     | 0.06 (-1.15, 1.30)   | 2001              | 2016     | 0.06 (-1.15, 1.30)   |
| Iowa           | -                 | -        | -                    | -                 | -        | -                    |
| Kansas         | -                 | -        | -                    | -                 | -        | -                    |
| Kentucky       | 2001              | 2016     | 0.49 (-1.37, 2.38)   | 2001              | 2016     | 0.49 (-1.37, 2.38)   |
| Louisiana      | 2001              | 2016     | -0.67 (-1.75, 0.43)  | 2001              | 2016     | -0.67 (-1.75, 0.43)  |
| Massachusetts  | 2001              | 2016     | -0.50 (-2.37, 1.40)  | 2001              | 2016     | -0.67 (-1.75, 0.43)  |
| Maryland       | 2001              | 2016     | 0.13 (-0.86, 1.13)   | 2001              | 2016     | 0.13 (-0.86, 1.13)   |
| Maine          | -                 | -        | -                    | -                 | -        | -                    |
| Michigan       | 2001              | 2006     | 4.29 (0.12, 8.64)    | 2001              | 2016     | 0.69 (-0.74, 2.13)   |
|                | 2006              | 2016     | -1.07 (-2.30, 0.17)  |                   |          |                      |
| Minnesota      | -                 | -        | -                    | -                 | -        | -                    |
| Missouri       | 2001              | 2016     | 0.92 (-0.87, 2.75)   | 2001              | 2016     | 0.92 (-0.87, 2.75)   |
| Mississippi    | 2003              | 2016     | 2.52 (1.13, 3.94)    | 2003              | 2016     | 2.52 (1.13, 3.94)    |
| Montana        | -                 | -        | -                    | -                 | -        | -                    |
| North Carolina | 2001              | 2016     | 0.46 (-0.52, 1.45)   | 2001              | 2016     | 0.46 (-0.52, 1.45)   |
| North Dakota   | -                 | -        | -                    | -                 | -        | -                    |
| Nebraska       | -                 | -        | -                    | -                 | -        | -                    |
| New Hampshire  | -                 | -        | -                    | -                 | -        | -                    |
| New Jersey     | 2001              | 2008     | 4.08 (0.60, 7.67)    | 2001              | 2016     | 0.79 (-1.02, 2.63)   |
|                | 2008              | 2016     | -2.00 (-4.33, 0.38)  |                   |          |                      |
| New Mexico     | -                 | -        | -                    | -                 | -        | -                    |
| Nevada         | -                 | -        | -                    | -                 | -        | -                    |
| New York       | 2001              | 2016     | 0.44 (-0.34, 1.22)   | 2001              | 2016     | 0.44 (-0.34, 1.22)   |
| Ohio           | 2001              | 2008     | 2.83 (-0.03, 5.77)   | 2001              | 2016     | -0.12 (-1.65, 1.44)  |
|                | 2008              | 2016     | -2.63 (-4.68, -0.53) |                   |          |                      |
| Oklahoma       | 2001              | 2016     | -2.40 (-4.33, -0.43) | 2001              | 2016     | -2.40 (-4.33, -0.43) |
| Oregon         | -                 | -        | -                    | -                 | -        | -                    |
| Pennsylvania   | 2001              | 2016     | 0.53 (-0.58, 1.65)   | 2001              | 2016     | 0.53 (-0.58, 1.65)   |
| Rhode Island   | -                 | -        | -                    | -                 | -        | -                    |
| South Carolina | 2001              | 2016     | 0.92 (-0.39, 2.25)   | 2001              | 2016     | 0.92 (-0.39, 2.25)   |
| South Dakota   | -                 | -        | -                    | -                 | -        | -                    |
| Tennessee      | 2001              | 2016     | 1.67 (0.55, 2.81)    | 2001              | 2016     | 1.67 (0.55, 2.81)    |
| Texas          | 2001              | 2016     | -0.07 (-0.70, 0.56)  | 2001              | 2016     | -0.07 (-0.70, 0.56)  |
| Utah           | -                 | -        | -                    | -                 | -        | -                    |
| Virginia       | 2001              | 2005     | 14.05 (-1.12, 31.54) | 2001              | 2016     | 3.53 (-0.25, 7.46)   |
|                | 2004              | 2016     | -0.05 (-2.38, 2.34)  |                   |          |                      |

---

|               |      |      |                     |      |      |                     |   |
|---------------|------|------|---------------------|------|------|---------------------|---|
| Vermont       | -    | -    | -                   | -    | -    | -                   | - |
| Washington    | 2001 | 2016 | -1.64 (-3.79, 0.55) | 2001 | 2016 | -1.64 (-3.79, 0.55) |   |
| Wisconsin     | 2001 | 2016 | 2.18 (0.83, 3.56)   | 2001 | 2016 | 2.18 (0.83, 3.56)   |   |
| West Virginia | -    | -    | -                   | -    | -    | -                   |   |
| Wyoming       | -    | -    | -                   | -    | -    | -                   |   |

---

**Supplementary Table 8.** Annual and average annual percent change in age-standardized pancreatic cancer incidence rates over time among Hispanics over 35 years-old, by state

| State          | Joinpoint segment |              | APC (95% CI)                               | Joinpoint segment |          | AAPC (95% CI)       |
|----------------|-------------------|--------------|--------------------------------------------|-------------------|----------|---------------------|
|                | Year start        | Year end     |                                            | Year start        | Year end |                     |
| Alaska         | -                 | -            | -                                          | -                 | -        | -                   |
| Alabama        | -                 | -            | -                                          | -                 | -        | -                   |
| Arkansas       | -                 | -            | -                                          | -                 | -        | -                   |
| Arizona        | 2001              | 2016         | 0.76 (-0.93, 2.49)                         | 2001              | 2016     | 0.76 (-0.93, 2.49)  |
| California     | 2001              | 2016         | -0.29 (-0.80, 0.22)                        | 2001              | 2016     | -0.29 (-0.80, 0.22) |
| Colorado       | 2001              | 2016         | -1.72 (-4.21, 0.84)                        | 2001              | 2016     | -1.72 (-4.21, 0.84) |
| Connecticut    | -                 | -            | -                                          | -                 | -        | -                   |
| Delaware       | -                 | -            | -                                          | -                 | -        | -                   |
| Florida        | 2001              | 2016         | 0.33 (-0.38, 1.04)                         | 2001              | 2016     | 0.33 (-0.38, 1.04)  |
| Georgia        | -                 | -            | -                                          | -                 | -        | -                   |
| Hawaii         | -                 | -            | -                                          | -                 | -        | -                   |
| Idaho          | -                 | -            | -                                          | -                 | -        | -                   |
| Illinois       | 2001<br>2005      | 2006<br>2016 | 8.56 (-1.95, 20.20)<br>-1.83 (-4.38, 0.79) | 2001              | 2016     | 1.52 (-1.88, 5.03)  |
| Indiana        | -                 | -            | -                                          | -                 | -        | -                   |
| Iowa           | -                 | -            | -                                          | -                 | -        | -                   |
| Kansas         | -                 | -            | -                                          | -                 | -        | -                   |
| Kentucky       | -                 | -            | -                                          | -                 | -        | -                   |
| Louisiana      | -                 | -            | -                                          | -                 | -        | -                   |
| Massachusetts  | -                 | -            | -                                          | -                 | -        | -                   |
| Maryland       | -                 | -            | -                                          | -                 | -        | -                   |
| Maine          | -                 | -            | -                                          | -                 | -        | -                   |
| Michigan       | -                 | -            | -                                          | -                 | -        | -                   |
| Minnesota      | -                 | -            | -                                          | -                 | -        | -                   |
| Missouri       | -                 | -            | -                                          | -                 | -        | -                   |
| Mississippi    | -                 | -            | -                                          | -                 | -        | -                   |
| Montana        | -                 | -            | -                                          | -                 | -        | -                   |
| North Carolina | -                 | -            | -                                          | -                 | -        | -                   |
| North Dakota   | -                 | -            | -                                          | -                 | -        | -                   |
| Nebraska       | -                 | -            | -                                          | -                 | -        | -                   |
| New Hampshire  | -                 | -            | -                                          | -                 | -        | -                   |
| New Jersey     | 2001              | 2016         | -0.10 (-1.41, 1.22)                        | 2001              | 2016     | -0.10 (-1.41, 1.22) |
| New Mexico     | 2001              | 2016         | 0.51 (-1.10, 2.14)                         | 2001              | 2016     | 0.51 (-1.10, 2.14)  |
| Nevada         | -                 | -            | -                                          | -                 | -        | -                   |
| New York       | 2001              | 2016         | 0.63 (-0.12, 1.39)                         | 2001              | 2016     | 0.41 (0.09, 0.72)   |
| Ohio           | -                 | -            | -                                          | -                 | -        | -                   |
| Oklahoma       | -                 | -            | -                                          | -                 | -        | -                   |
| Oregon         | -                 | -            | -                                          | -                 | -        | -                   |
| Pennsylvania   | -                 | -            | -                                          | -                 | -        | -                   |
| Rhode Island   | -                 | -            | -                                          | -                 | -        | -                   |
| South Carolina | -                 | -            | -                                          | -                 | -        | -                   |
| South Dakota   | -                 | -            | -                                          | -                 | -        | -                   |
| Tennessee      | -                 | -            | -                                          | -                 | -        | -                   |
| Texas          | 2001              | 2016         | 0.29 (-0.28, 0.87)                         | 2001              | 2016     | 0.29 (-0.28, 0.87)  |
| Utah           | -                 | -            | -                                          | -                 | -        | -                   |
| Virginia       | -                 | -            | -                                          | -                 | -        | -                   |
| Vermont        | -                 | -            | -                                          | -                 | -        | -                   |
| Washington     | -                 | -            | -                                          | -                 | -        | -                   |
| Wisconsin      | -                 | -            | -                                          | -                 | -        | -                   |
| West Virginia  | -                 | -            | -                                          | -                 | -        | -                   |

---

|         |   |   |   |   |   |   |
|---------|---|---|---|---|---|---|
| Wyoming | - | - | - | - | - | - |
|---------|---|---|---|---|---|---|

---
